# Supplementary material for: Mouse BRWD1 is critical for spermatid postmeiotic transcription and female meiotic chromosome stability
Source: PubMed Central journal article supplement — J Cell Biol. 2015 Jan 5;208(1):53–69. doi: 10.1083/jcb.201404109 (PMC4284233; doi:10.1083/jcb.201404109), 2015-01-05
Supplement: supp_jcb.201404109_JCB_201404109_sm.pdf [file supp_jcb.201404109_JCB_201404109_sm.pdf]

Pattabiraman et al., <http://www.jcb.org/cgi/content/full/jcb.201404109/DC1>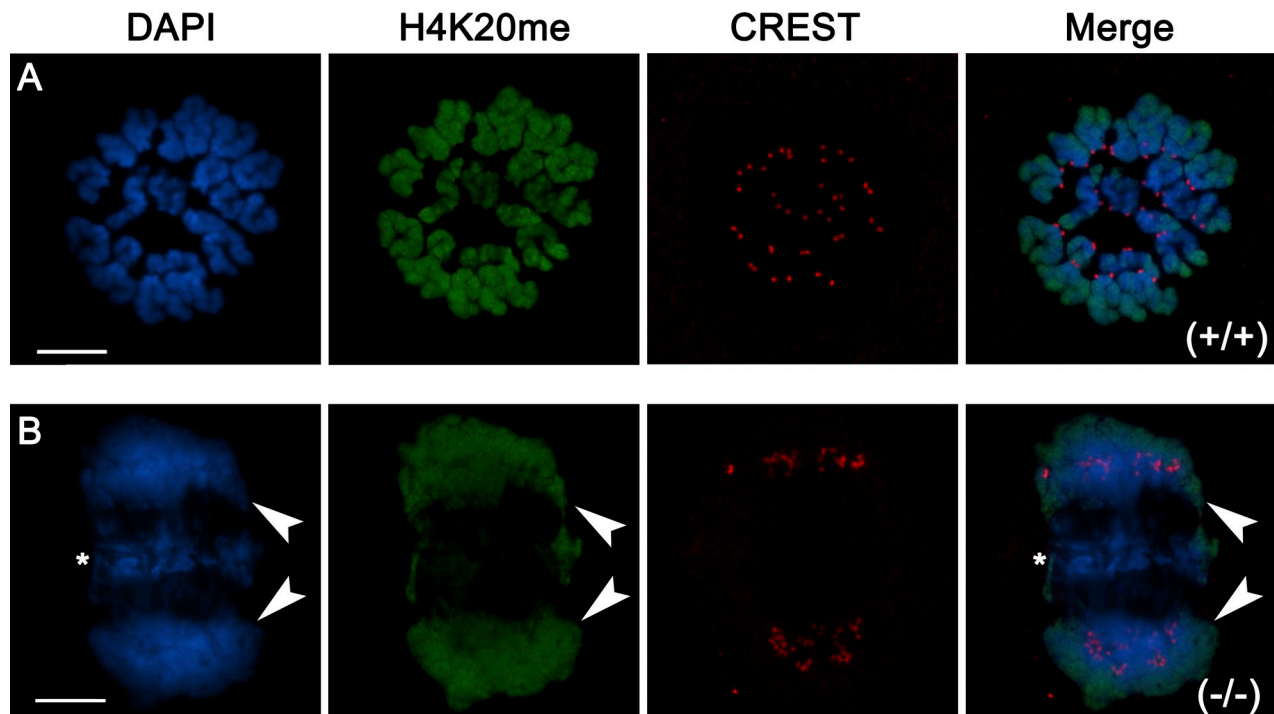

Figure S1. **Normal histone methylation in *Brwd1* mutant oocytes.** (A) Monomethylation of histone H4 at lysine 20 (H4K20me<sub>1</sub>; green) throughout the chromatids of meiotic chromosomes in WT oocytes. Centromeres are stained with CREST antiserum (red). (B) The localization of H4K20me<sub>1</sub> to the chromosomes of *Brwd1*<sup>-/-</sup> oocytes is interrupted only by the loss of structural integrity at anaphase bridges.

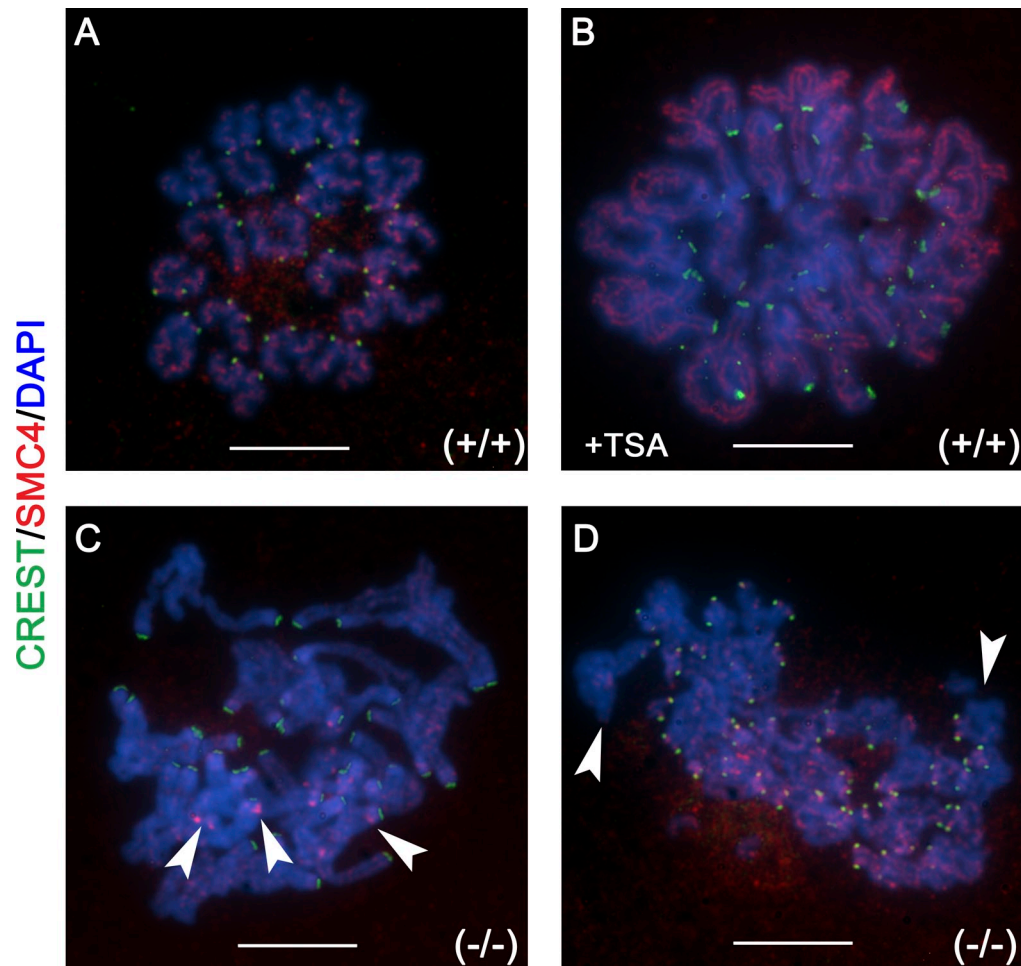

Figure S2. **Localization of structural maintenance of chromosome (SMC4) to the axial chromatid core in *Brwd1*<sup>-/-</sup> oocytes.** (A) Control WT oocyte showing axial labeling of SMC4 (red) along each chromatid at the metaphase II stage. Centromere–kinetochore domains are stained with CREST (green). (B) Exposure of WT oocytes to TSA induces chromosome elongation without disrupting the axial chromosomal localization of SMC4. (C) Chromosomes in *Brwd1*<sup>-/-</sup> oocytes exhibit axial chromatid SMC4 localization, albeit with a nodular appearance at distinct chromosomal regions (arrowheads). (D) SMC4 staining in the chromosomes of mutant oocytes is interrupted only by the loss of structural integrity (arrowheads). Bars, 10  $\mu$ m.

Table S1. **Real-time PCR primer sequences**

| No. | Gene          | Forward primer sequence (5'-3') | Reverse primer sequence (5'-3') |
|-----|---------------|---------------------------------|---------------------------------|
| 1   | <i>Tnp1</i>   | GGGCGATGATGCAAGTCGCAATTA        | TCACGACTGGCATTACCCACTCT         |
| 2   | <i>Tnp2</i>   | AAGTGAGCAAGAGAAAAGGCCGTCA       | ACATCCTGGAGTGCGTCACTTGTA        |
| 3   | <i>Prm1</i>   | AGACTTCAAGAGCATCTCGCCACA        | ACAGGTGGCATTGTTCTTAGCAG         |
| 4   | <i>Prm2</i>   | TGCAGGAAATGTAGGAGGCACCAT        | AGGGCTCAGACATCGACATGGAAT        |
| 5   | <i>Akap4</i>  | ACGGGCCATTTGGATTACCAGAGA        | TTGCCACTCCTGAGGGAGAATGTT        |
| 6   | <i>Hsp1a</i>  | TTCCTTTATCCAAGCCGTAGGCCGA       | AGGTGTCATCGCAGGACTCAATGT        |
| 7   | <i>Tssk6</i>  | TGCTGTTGGGTTCTGATTCCTCT         | AGGCGCAATGCTTCTCTCTTCT          |
| 8   | <i>Fscn3</i>  | TGGCCTGCTAATGGCAAATGTCAC        | TGGCGACAGGGCAATAGCTGAATA        |
| 9   | <i>Oxct2a</i> | AGGTGCTGCTAAGGATGTCCAGTT        | ACCTCAAGCCCATGCAGCAGATTA        |

Table S2. List of annotated genes with at least twofold lower expression of mRNA in *Brdw1*<sup>-/-</sup> oocytes at the GV stage compared to WT oocytes after microarray analysis

| MGI gene ID | Gene symbol | Gene name                                        | Feature type   |
|-------------|-------------|--------------------------------------------------|----------------|
| MGI:1913523 | <i>Aamd</i> | Adipogenesis associated Mth938 domain containing | Protein coding |

Table S3. List of annotated genes with at least twofold higher expression of mRNA in *Brdw1*<sup>-/-</sup> oocytes at the GV stage compared to WT oocytes after microarray analysis

| MGI gene ID | Gene symbol   | Gene name                    | Feature type   |
|-------------|---------------|------------------------------|----------------|
| MGI:96163   | <i>Hmox1</i>  | Heme oxygenase (decycling) 1 | Protein coding |
| MGI:2686410 | <i>Gm1564</i> | predicted gene 1564          | Protein coding |
